# Supplementary material for: Associations between whole peripheral blood fatty acids and DNA methylation in humans
Source: PubMed Central journal article supplement (PMC4867649; doi:10.1038/srep25867), 2016-05-16
Supplement: srep25867-s1.pdf [file srep25867-s1.pdf]

Supplementary Material

Manuscript # SREP-15-34573A

Title: Associations between whole peripheral blood fatty acids and DNA methylation in humans

Authors: Carmen de la Rocha, José E. Pérez-Mojica, Silvia Zenteno-De León, Braulio Cervantes-Paz, Fabiola E. Tristán-Flores, Dalia Rodríguez-Ríos, Jorge Molina-Torres, Enrique Ramírez-Chávez, Yolanda Alvarado-Caudillo, F. Javier Carmona, Manel Esteller, Rosaura Hernández-Rivas, Katarzyna Wrobel, Kazimierz Wrobel, Silvio Zaina, Gertrud Lund

Content:

Supplementary Figure 1

Supplementary Tables 1 - 9

A

human *HDAC4* promoter, chromosome 2:239,401,946-239,402,052 (- strand)

-993 IGGGAGGCTTGTGTTGAGTTACAGGTCGGCCCGTAGATCCCCGGAAGCGCCTT

**TGGTTGCCAGCAGGTG**CGGC<sup>\*</sup>CGAGGGTCTTCAGTGGCCACCCTCCTGGTGGTGA -1,100  
 1 2

B

human *PDK4* 5'UTR, chromosome 7:95,596,341-95,596,522 (- strand)

→  
 +92 GGTGGGAAGACTTGAACTTGAATCTCGAACCACTGCATCTCCGACTCTGCCCAGA  
 CTCTTCACTCCGCGGCACCCCTCAAACCCAGCCCAGGCCGGGGCACACAAGCCAGCC  
 1 2  
 AGCGCACCTGCAGTCCTCGCCCGGACGCGCCGCGCCCCCTCGGAACCAGGCTCTGCT  
 3 4 5  
CCGAGCAGCCTTC +273

C

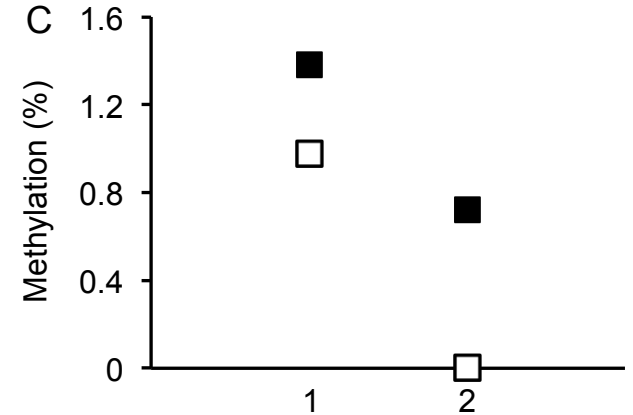

D

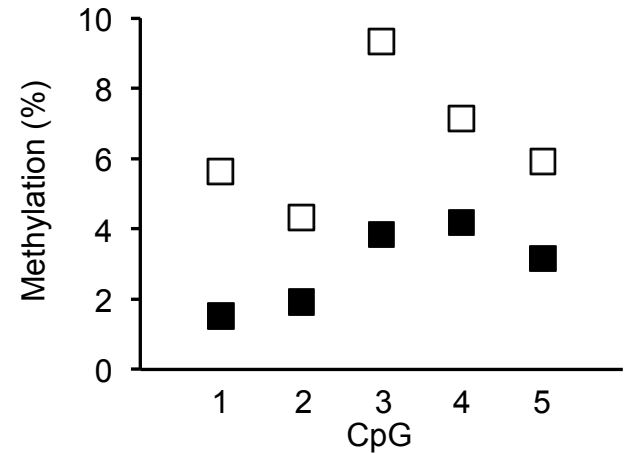

**Supplementary Figure 1 – Example of pyrosequencing data for *HDAC4* and *PDK4*.** A and B) Position of each sequenced CpG (underlined and numbered) in *HDAC4* and *PDK4* respectively. Priming sites for PCR and sequencing oligonucleotides are in underlined italics and bold, respectively. The asterisk in *HDAC4* marks the CpG that is hypomethylated in response to AA in THP-1 cells (cg15142485 in Illumina’s Infinium HumanMethylation450 BeadChip; Silva-Martínez et al., in press). The boxed *PDK4* sequence is the priming site for the 5’ oligonucleotide (extending left-to-right) used for bisulfite sequencing by Kulkarni et al. (ref. 21 in main text). The numbers at the sequence ends indicate the distance from the transcription start site (bp). The arrow in *PDK4* indicates the direction of transcription. Coordinates were determined by BLAT using the hg38 assembly. C and D) Methylation levels of individual CpGs (numbered as in A,B) of *HDAC4* and *PDK4*, respectively, in two AMM samples with ~2-fold difference in AA levels – i.e. 3.72% (solid squares) and 8.79% (open squares) are shown.

## Supplementary Tables

**Supplementary Table 1. General characteristics of the LI cohort (n=49).**

---

|                         |                          |
|-------------------------|--------------------------|
| Females (n)             | 27                       |
| Males (n)               | 22                       |
| Weight at birth (kg)    | 3.2 $\pm$ 0.07 (2.1-4.1) |
| Weight at sampling (kg) | 5.4 $\pm$ 1.6 (2.6-8.6)  |
| Age at sampling (days)  | 89.6 $\pm$ 68.2 (10-333) |

---

Continuous variables are represented as average $\pm$ SEM (minimum-maximum).

**Supplementary Table 2 - Non-significant multiple regression results.**

2.1 - Non-significant results for main text Table 1.

| Variable                              | Beta    | t       | p      |
|---------------------------------------|---------|---------|--------|
| SFA                                   | -0.0042 | -0.0500 | 0.9604 |
| MUFA                                  | -0.0512 | -0.4699 | 0.6407 |
| PUFA                                  | 0.0990  | 1.4550  | 0.1526 |
| C8:0                                  | -1.6417 | -1.3022 | 0.2084 |
| C10:0                                 | -0.2358 | -0.1513 | 0.8813 |
| C12:0                                 | 0.0607  | 0.1667  | 0.8686 |
| C14:0                                 | -0.0774 | -0.2978 | 0.7676 |
| C14:1                                 | -8.3400 | -1.9342 | 0.0681 |
| C15:0                                 | 0.5570  | 0.2174  | 0.8302 |
| C16:0                                 | 0.0225  | 0.4882  | 0.6284 |
| C16:1                                 | -0.2201 | -0.7229 | 0.4744 |
| C17:0                                 | 0.9517  | 0.6548  | 0.5167 |
| C17:1                                 | -0.8565 | -0.2655 | 0.1611 |
| C18:0                                 | 0.0251  | 0.3373  | 0.7379 |
| tC18:1                                | 1.1994  | 0.8623  | 0.3942 |
| cC18:1                                | -0.0078 | -0.0943 | 0.9254 |
| C18:2(n-6)                            | -0.0234 | -0.5207 | 0.6086 |
| C18:3                                 | -0.1654 | -0.3131 | 0.7576 |
| C20:0                                 | 1.0791  | 1.1196  | 0.2703 |
| C20:1                                 | -3.6039 | -1.3543 | 0.1915 |
| C20:3                                 | 0.1896  | 0.9426  | 0.3577 |
| C22:0                                 | 0.2244  | 0.6389  | 0.5360 |
| C22:2                                 | 0.0587  | 1.5738  | 0.1438 |
| C22:6(n-3)                            | 0.2202  | 0.7677  | 0.4588 |
| C24:1                                 | 0.2672  | 0.7352  | 0.4776 |
| Age                                   | 0.0000  | 0.1204  | 0.9056 |
| Sex                                   | 0.0050  | 0.1341  | 0.8815 |
| Weight at birth                       | 0.0761  | 1.6282  | 0.1219 |
| Birth-to-sampling weight increase/day | 0.0811  | 1.7112  | 0.1444 |

2.2 - Non-significant results for Supplementary Table 8.

| Weight at birth |         |         |        | Birth-to-sampling weight increase/day |         |         |        |
|-----------------|---------|---------|--------|---------------------------------------|---------|---------|--------|
| FA              | Beta    | t       | p      | FA                                    | Beta    | t       | p      |
| C8:0            | 0.1925  | 0.1829  | 0.8568 | C8:0                                  | -0.0123 | -0.4350 | 0.6702 |
| C10:0           | -0.9266 | -0.5912 | 0.5614 | C10:0                                 | -0.0111 | -0.2937 | 0.7733 |
| C12:0           | 0.1919  | 0.4296  | 0.6723 | C12:0                                 | -0.0025 | -0.2336 | 0.8187 |
| C14:0           | 0.2265  | 0.6605  | 0.5168 | C14:0                                 | 0.0045  | 0.5015  | 0.6238 |
| C14:1           | -0.8964 | -0.2664 | 0.7928 | C14:1                                 | -0.1515 | -1.5275 | 0.1489 |
| C15:0           | 3.3774  | 1.3626  | 0.1890 | C15:0                                 | 0.0358  | 0.4274  | 0.6756 |

|            |         |         |        |            |         |         |        |
|------------|---------|---------|--------|------------|---------|---------|--------|
| C16:0      | -0.0635 | -0.4398 | 0.6660 | C16:1      | 0.0167  | 0.9119  | 0.3772 |
| C16:1      | 0.0135  | 0.0237  | 0.9813 | C17:0      | -0.0828 | -1.1568 | 0.2667 |
| C17:0      | -3.4064 | -1.4131 | 0.1768 | C18:0      | -0.0014 | -0.7884 | 0.4407 |
| C17:1      | -1.0508 | -0.5978 | 0.5583 | tC18:1     | 0.0047  | 0.3640  | 0.7201 |
| C18:0      | -0.0603 | -0.8020 | 0.4308 | cC18:1     | -0.0015 | -1.5070 | 0.1491 |
| tC18:1     | 0.2966  | 0.7009  | 0.4904 | C18:2(n-6) | -0.0011 | -1.3367 | 0.1980 |
| cC18:1     | 0.0061  | 0.1429  | 0.8876 | C18:3      | -0.0058 | -0.5567 | 0.5839 |
| C18:3      | 0.2836  | 0.7099  | 0.4843 | C20:0      | 0.0039  | 0.0830  | 0.9349 |
| C20:0      | -0.1412 | -0.1056 | 0.9171 | C20:1      | -0.0156 | -0.3792 | 0.7085 |
| C20:1      | -1.1999 | -0.6577 | 0.5167 | C20:3      | 0.0057  | 1.6396  | 0.1270 |
| C20:3      | 0.0213  | 0.0993  | 0.9223 | C20:4      | -0.0113 | -1.6413 | 0.1247 |
| C20:4      | 0.2248  | 1.1114  | 0.2839 | C20:5      | 0.0330  | 0.6375  | 0.5349 |
| C20:5      | 2.3165  | 1.4099  | 0.1790 | C22:0      | -0.0069 | -2.0417 | 0.0570 |
| C22:0      | 0.0331  | 0.3174  | 0.7544 | C22:2      | 0.0066  | 0.1414  | 0.8897 |
| C22:2      | 1.5241  | 1.0433  | 0.3133 | C22:6(n-3) | 0.0250  | 1.2504  | 0.2332 |
| C22:6(n-3) | -0.8335 | -1.3802 | 0.1878 | C24:1      | -0.0466 | -0.6990 | 0.4969 |
| C24:1      | -3.1132 | -1.4486 | 0.1680 |            |         |         |        |

2.3 - Non-significant results for Supplementary Table 3. Void entries are significant associations with age.

| FA         | Age     |         |        | Sex     |         |        |
|------------|---------|---------|--------|---------|---------|--------|
|            | Beta    | t       | p      | Beta    | t       | p      |
| C8:0       | 0.0003  | 0.6621  | 0.5139 | 0.0135  | 0.2596  | 0.7973 |
| C10:0      | -0.0002 | -0.5007 | 0.6210 | -0.0120 | -0.3184 | 0.7528 |
| C12:0      | -0.0005 | -0.5651 | 0.5749 | 0.1930  | 1.6237  | 0.1116 |
| C14:0      | 0.0016  | 1.1150  | 0.2709 | 0.1809  | 0.9458  | 0.3494 |
| C14:1      | 0.0001  | 0.8972  | 0.3782 | 0.0167  | 1.1019  | 0.2810 |
| C15:0      | 0.0001  | 0.3519  | 0.7279 | -0.0246 | -1.1948 | 0.2434 |
| C16:0      | 0.0025  | 0.6247  | 0.5354 | -0.4762 | -0.8820 | 0.3825 |
| C16:1      | 0.0010  | 1.3268  | 0.1914 | -0.0480 | -0.4740 | 0.6378 |
| C17:0      | 0.0004  | 2.0069  | 0.0509 | -0.0216 | -0.8845 | 0.3812 |
| C17:1      |         |         |        | -0.0148 | -0.4680 | 0.6461 |
| C18:0      |         |         |        | -0.3877 | -0.4805 | 0.6332 |
| tC18:1     | 0.0007  | 0.9926  | 0.3263 | -0.0572 | -0.6199 | 0.5385 |
| cC18:1     | 0.0162  | 1.9178  | 0.0616 | 0.9956  | 0.8690  | 0.3896 |
| C18:2(n-6) | 0.0206  | 1.8838  | 0.0713 | 1.1933  | 0.9298  | 0.3614 |
| C18:3      |         |         |        | 0.0194  | 0.3937  | 0.6990 |
| C20:0      | -0.0003 | -1.7593 | 0.0855 | -0.0081 | -0.3427 | 0.7335 |
| C20:1      | -0.0003 | -1.4807 | 0.1512 | 0.0113  | 0.5343  | 0.5979 |
| C20:3      | -0.0028 | -1.1133 | 0.2762 | -0.2145 | -0.7163 | 0.4804 |
| C20:4      | 0.0011  | 0.1566  | 0.8763 | -0.2383 | -0.2568 | 0.7985 |
| C20:5      | -0.0004 | -1.7724 | 0.0954 | 0.0063  | 0.1677  | 0.8689 |
| C22:0      |         |         |        | -0.6730 | -1.9656 | 0.0669 |
| C22:2      | -0.0002 | -1.0432 | 0.3124 | 0.0038  | 0.1438  | 0.8875 |
| C22:6(n-3) | -0.0002 | -0.3029 | 0.7659 | 0.1597  | 1.5913  | 0.1311 |
| C24:1      |         |         |        | -0.0668 | -2.9537 | 0.3859 |

2.4 - Non-significant results for main text Table 2.

| PD                |         |         |        | FD                |         |         |        |
|-------------------|---------|---------|--------|-------------------|---------|---------|--------|
| Variable          | Beta    | t       | p      | Variable          | Beta    | t       | p      |
| SFAs              | -0.0088 | -0.2792 | 0.7864 | SFAs              | 0.0599  | 1.6969  | 0.1239 |
| MUFAs             | 0.0175  | 0.7030  | 0.4998 | MUFAs             | -0.0321 | -0.7997 | 0.4445 |
| C18:2(n-6)        | 0.0136  | 0.2947  | 0.7960 | C18:2(n-6)        | 0.0298  | 1.6037  | 0.1599 |
| C18:3             | 2.0590  | 1.5249  | 0.2668 | C18:3             | -0.2205 | -0.2873 | 0.7835 |
| C20:2             | -1.4038 | -0.9300 | 0.4505 | C20:2             | 1.4889  | 1.8629  | 0.0887 |
| C20:3             | -0.0205 | -0.0386 | 0.9727 | C20:3             | -0.1471 | -0.8513 | 0.4273 |
| C22:4             | -1.5001 | -1.0892 | 0.3078 | C20:4             | -0.0623 | -1.7656 | 0.1079 |
| C22:5             | -0.1151 | -0.2486 | 0.8099 | C22:4             | -0.0623 | -1.7656 | 0.1079 |
| C22:6(n-3)        | 0.4991  | 2.2890  | 0.0513 | C22:5             | 0.1008  | 0.4118  | 0.6892 |
| HDL               | -1.9040 | -0.5259 | 0.6214 | C22:6(n-3)        | 0.0857  | 0.4889  | 0.6354 |
| LDL               | -1.8363 | -0.5062 | 0.6342 | HDL               | -0.1499 | -2.5177 | 0.0864 |
| VLDL              | -2.7634 | -1.2383 | 0.2706 | LDL               | -0.1300 | -2.4800 | 0.0893 |
| Triglycerides     | -0.1782 | -0.5588 | 0.6004 | VLDL              | -2.2190 | -2.7252 | 0.0951 |
| Total cholesterol | 1.8483  | 0.5095  | 0.6321 | Triglycerides     | -0.4164 | -2.5514 | 0.1048 |
| Systolic BP       | 0.0275  | 2.1369  | 0.0613 | Total cholesterol | 0.1292  | 2.4670  | 0.0903 |
| Diastolic BP      | -0.0178 | -0.9547 | 0.3647 | Glucose           | 0.0372  | 2.2557  | 0.1094 |
| Age               | 0.0141  | 1.0607  | 0.3165 | Systolic BP       | 0.0168  | 1.4624  | 0.1777 |
|                   |         |         |        | Diastolic BP      | 0.0084  | 0.7887  | 0.4505 |
|                   |         |         |        | Age               | -0.0001 | -0.0077 | 0.9940 |

2.5 - Non-significant results for main text Table 3.

| PD                |         |         |        | FD            |         |         |        |
|-------------------|---------|---------|--------|---------------|---------|---------|--------|
| Variable          | Beta    | t       | p      | Variable      | Beta    | t       | p      |
| SFAs              | 0.0312  | 1.5077  | 0.1754 | SFAs          | 0.0609  | 1.6308  | 0.1470 |
| MUFAs             | -0.0109 | -0.4218 | 0.6858 | MUFAs         | -0.1090 | -2.2046 | 0.0633 |
| PUFAs             | 0.0018  | 0.3078  | 0.7672 | PUFAs         | -0.0093 | -0.4618 | 0.6582 |
| C18:2(n-6)        | -0.0154 | -0.5158 | 0.7118 | C18:2(n-6)    | -0.0142 | -0.4999 | 0.6611 |
| C18:3             | -0.5436 | -1.6611 | 0.2210 | C18:3         | 0.0264  | 0.2891  | 0.8912 |
| C20:2             | -0.4113 | -1.1123 | 0.2413 | C20:2         | 0.2151  | 0.1815  | 0.9002 |
| C20:3             | -0.1322 | -0.1110 | 0.4811 | C20:3         | -0.0959 | -0.5114 | 0.6717 |
| C20:5             | -0.1270 | -0.4571 | 0.6585 | C20:4         | -0.0019 | -0.5466 | 0.6616 |
| C22:4             | -0.0974 | -0.4997 | 0.6612 | C20:5         | 0.0458  | 0.2832  | 0.8811 |
| C22:5             | -0.0662 | -0.3113 | 0.4812 | C22:4         | 0.0298  | 0.7612  | 0.5114 |
| C22:6(n-3)        | -0.0808 | -0.2231 | 0.7913 | C22:5         | 0.0106  | 0.4118  | 0.7713 |
| HDL               | 1.4501  | 0.2356  | 0.8289 | C22:6(n-3)    | 0.0129  | 1.6114  | 0.8992 |
| LDL               | 1.4637  | 0.2378  | 0.8273 | HDL           | -0.1354 | -2.1397 | 0.1219 |
| VLDL              | 2.1708  | 0.6644  | 0.5539 | LDL           | -0.0935 | -1.5133 | 0.2274 |
| Triglycerides     | -0.1418 | -0.2432 | 0.8235 | VLDL          | -0.4346 | -1.3119 | 0.2809 |
| Total cholesterol | -1.4548 | -0.2364 | 0.8284 | Triglycerides | 0.0652  | 1.0303  | 0.3787 |

|              |         |         |        |                   |         |         |        |
|--------------|---------|---------|--------|-------------------|---------|---------|--------|
| Glucose      | -0.0024 | -0.2012 | 0.8534 | Total cholesterol | 0.0895  | 1.4498  | 0.2430 |
| Systolic BP  | 0.0125  | 0.9239  | 0.3863 | Systolic BP       | 0.0011  | 0.1583  | 0.8787 |
| Diastolic BP | -0.0010 | -0.0558 | 0.9570 | Diastolic BP      | -0.0024 | -0.3991 | 0.7017 |
| Age          | -0.0012 | -0.6370 | 0.5444 | Age               | 0.0162  | 1.9307  | 0.0948 |
| BMI          | 0.1812  | 3.3200  | 0.0671 | BMI               | 0.0025  | 0.1513  | 0.8840 |

2.6 - Non-significant results for Supplementary Table 7.

| PD    |          |          |         | FD    |          |
|-------|----------|----------|---------|-------|----------|
| FA    | Beta     | t        | p       | FA    | Beta     |
| C14:0 | 0.03293  | 1.02202  | 0.32872 | C14:0 | 0.01465  |
| C15:0 | -0.00639 | -0.59916 | 0.56794 | C15:0 | -0.00634 |
| C16:0 | -0.30933 | -1.63823 | 0.12963 | C16:0 | -0.1694  |
| C16:1 | 0.02509  | 0.61991  | 0.54795 | C16:1 | 0.00842  |
| C18:0 | 0.07954  | 1.07459  | 0.30556 | C20:1 | 0.01728  |
| C18:3 | 0.03194  | 2.16389  | 0.07368 |       |          |
| C20:1 | 0.01889  | 1.66154  | 0.12481 |       |          |
| C20:3 | 0.06827  | 2.15097  | 0.05455 |       |          |

2.7 - Non-significant results for Supplementary Table 9.

| PD         |            |          |         | FD         |            |          |         |
|------------|------------|----------|---------|------------|------------|----------|---------|
| FA         | Beta       | t        | p       | FA         | Beta       | t        | p       |
| C14:0      | 2.6749     | 0.9697   | 0.40372 | C14:0      | -15.9718   | -2.73499 | 0.07164 |
| C15:0      | -14.79211  | -1.46329 | 0.23958 | C15:0      | 46.2854    | 1.87408  | 0.15762 |
| C17:0      | -7.10531   | -1.31953 | 0.27866 | C16:1      | 6.69953    | 2.01807  | 0.13691 |
| C18:0      | 0.57799    | 1.57672  | 0.21295 | C16:0      | 0.29217    | 1.33328  | 0.27464 |
| C18:2(n-6) | 6.2486     | 3.74569  | 0.16609 | C17:0      | -8.55814   | -1.22366 | 0.30842 |
| C18:3      | -208.46313 | -4.42163 | 0.1416  | C18:2(n-6) | -0.21114   | -0.21388 | 0.86586 |
| C20:1      | 90.64885   | 5.6082   | 0.11234 | C18:3      | -14.4505   | -0.35454 | 0.7831  |
| C20:2      | 187.86309  | 4.9139   | 0.12781 | C20:1      | -182.90387 | -1.51737 | 0.37096 |
| C20:3      | -37.73741  | -3.17185 | 0.19443 | C20:2      | -0.41912   | -0.00735 | 0.99532 |
| C20:4      | -5.8948    | -2.26168 | 0.26503 | C20:3      | 38.24202   | 2.02865  | 0.29156 |
| C20:5      | 2.84867    | 0.11971  | 0.92415 | C20:4      | 19.42252   | 1.90901  | 0.30719 |
| C22:4      | 59.85599   | 2.27185  | 0.09642 | C20:5      | 83.50241   | 1.33008  | 0.41041 |
| C22:6      | -7.83781   | -0.87636 | 0.4014  | C22:4      | -187.10348 | -1.90272 | 0.30805 |
|            |            |          |         | C22:5      | -38.12658  | -1.37374 | 0.40058 |
|            |            |          |         | C22:6      | 26.69734   | 1.19489  | 0.44362 |

2.8 - Non-significant results for main text Table 4.

| PD       |         |         |        | FD         |         |         |        |
|----------|---------|---------|--------|------------|---------|---------|--------|
| Variable | Beta    | t       | p      | Variable   | Beta    | t       | p      |
| SFAs     | 0.0766  | 0.3821  | 0.7137 | SFAs       | 0.2197  | 1.5635  | 0.1619 |
| MUFAs    | -0.0689 | -0.2751 | 0.7912 | MUFAs      | -0.2127 | -1.1141 | 0.3020 |
| PUFAs    | 0.0760  | 1.3249  | 0.2268 | C18:2(n-6) | 0.3548  | 0.7875  | 0.5135 |

|                   |           |         |        |                   |         |         |        |
|-------------------|-----------|---------|--------|-------------------|---------|---------|--------|
| C18:2(n-6)        | 0.1592    | 0.1121  | 0.9289 | C18:3             | -6.0250 | -0.6939 | 0.5595 |
| C18:3             | -10.5092  | -0.1328 | 0.9160 | C20:2             | 4.0409  | 0.4581  | 0.6918 |
| C20:2             | 29.6580   | 0.2997  | 0.8146 | C20:3             | 0.3706  | 0.2163  | 0.8488 |
| C20:3             | -2.0797   | -0.1758 | 0.8892 | C22:4             | -1.1568 | -0.3344 | 0.7699 |
| C20:4             | 2.1118    | 0.8767  | 0.6964 | C22:5             | 2.5226  | 0.5047  | 0.6639 |
| C22:4             | 22.2071   | 0.6258  | 0.6440 | C22:6(n-3)        | -0.3312 | -0.2800 | 0.8058 |
| C22:5             | -33.4401  | -1.1094 | 0.4670 | HDL               | -0.0941 | -0.3018 | 0.7825 |
| C22:6(n-3)        | -2.6068   | -0.1542 | 0.9026 | LDL               | -0.0982 | -0.3228 | 0.7680 |
| HDL               | 205.7621  | 0.4565  | 0.6928 | VLDL              | -1.5502 | -0.9502 | 0.4121 |
| LDL               | -205.5375 | -0.4575 | 0.6922 | Triglycerides     | 0.2774  | 0.8897  | 0.4392 |
| VLDL              | -108.1133 | -0.4559 | 0.6932 | Total cholesterol | 0.0903  | 0.2972  | 0.7857 |
| Triglycerides     | -19.4755  | -0.4565 | 0.6928 | Glucose           | 0.0705  | 1.7117  | 0.1855 |
| Total cholesterol | -205.5949 | -0.4574 | 0.6923 | Systolic BP       | 0.0166  | 0.7965  | 0.4519 |
| Glucose           | -0.0412   | -0.0295 | 0.9791 | Diastolic BP      | 0.0264  | 1.4263  | 0.1968 |
| Systolic BP       | 0.0432    | 1.4111  | 0.2222 | Age               | 0.0429  | 1.7093  | 0.1312 |
| Diastolic BP      | 0.0334    | 1.3989  | 0.1994 | BMI               | 0.0289  | 1.4545  | 0.1798 |
| Age               | 0.2011    | 2.4463  | 0.0707 |                   |         |         |        |
| BMI               | 0.2725    | 1.5482  | 0.1965 |                   |         |         |        |



**Supplementary Table 3 – Significant associations of age at sampling with FAs (dependent variable) adjusted for sex in the LI cohort.**

| Variable    | Beta    | t       | p      | adjusted R <sup>2</sup> |
|-------------|---------|---------|--------|-------------------------|
| C17:1       | -0.0004 | -2.2275 | 0.0406 | 0.1522                  |
| C18:0       | -0.0150 | -2.5320 | 0.0149 | 0.0949                  |
| C18:3(n-3)  | 0.0007  | 2.1569  | 0.0465 | 0.1367                  |
| C22:0       | -0.0082 | -3.5946 | 0.0024 | 0.4566                  |
| C24:1       | -0.0006 | -3.4719 | 0.0031 | 0.4628                  |
| C22:0+C24:1 | -0.0089 | -3.8105 | 0.0015 | 0.4912                  |

Beta values indicate the change in percentage FA per one-day age increase. Non-significant associations are shown in Supplementary Table 2.3.

**Supplementary Table 4. General characteristics of the AMM subjects.**

|                          | BMI Groups   |                     |                         |                    |
|--------------------------|--------------|---------------------|-------------------------|--------------------|
|                          | All subjects | Normal <sup>b</sup> | Overweight <sup>c</sup> | Obese <sup>d</sup> |
|                          | n=12         | n=4                 | n=4                     | n=4                |
| Age (years)              | 34.9 (0.5)   | 36.5 (2.1)          | 31.5 (3.9)              | 36.7 (3.7)         |
| Height (cm)              | 170.1 (1.8)  | 166.5 (3.7)         | 169.0 (2.6)             | 174.8 (1.8)        |
| Weight (kg)              | 81.1 (5.2)   | 61.4 (2.7)**        | 80.7 (2.6)**            | 101.4 (4.3)***     |
| BMI (kg/m <sup>2</sup> ) | 28.0 (1.4)   | 22.4 (0.4)**        | 28.4 (0.8)*             | 33.2 (1.5)***      |
| WC (cm) <sup>a</sup>     | 99.1 (3.7)   | 85.2 (4.3)*         | 100.6 (3.7)             | 111.5 (2.0)**      |
| HC (cm) <sup>a</sup>     | 106.0 (2.7)  | 95.8 (1.6)*         | 105.5 (1.4)**           | 116.7 (2.1)***     |
| WHR (cm/cm)              | 0.93 (0.01)  | 0.88 (0.03)         | 0.95 (0.02)             | 0.95 (0.01)        |
| WHtR (cm/cm)             | 0.58 (0.01)  | 0.51 (0.02)         | 0.59 (0.02)             | 0.63 (0.01)**      |
| SBP (mmHg)               | 113.3 (3.2)  | 103.7 (3.7)         | 112.5 (4.7)             | 123.7 (3.7)*       |
| DBP (mmHg)               | 77.9 (1.6)   | 75.0 (3.5)          | 78.7 (1.2)              | 80.0 (3.5)         |

Data are presented as means (SEM). HC, hip circumference; SBP and DBP, diastolic and systolic blood pressure, respectively; WC, waist circumference; WHR, waist-to-hip ratio; WHtR, waist-to-height ratio. <sup>a</sup> measurements carried out not in the same day as blood extraction; <sup>b</sup> differences between normal and overweight groups; <sup>c</sup> differences between overweight and obese groups; <sup>d</sup> differences between obese and normal groups; \*= $p < 0.05$ ; \*\*= $p < 0.01$ ; \*\*\*= $p < 0.001$ ; one-way ANOVA.

**Supplementary Table 5** - Correlations between metabolic parameters and DNA methylation in subject-averaged repeated measurements (n=5 per subject).

| Variable        | Day | Pearson's r |
|-----------------|-----|-------------|
| TG (mg/dL)      | FD  | -0.601*     |
|                 | PD  | -0.654*     |
| WBFA (mmol /L)  | FD  | 0.160       |
|                 | PD  | -0.258      |
| HDL (mg/dL)     | FD  | 0.496       |
|                 | PD  | 0.129       |
| LDL (mg/dL)     | FD  | -0.192      |
|                 | PD  | -0.152      |
| VLDL (mg/dL)    | FD  | -0.600*     |
|                 | PD  | -0.653*     |
| TC (mg/dL)      | FD  | -0.540      |
|                 | PD  | -0.431      |
| Glucose (mg/dL) | FD  | 0.077       |
|                 | PD  | -0.521      |

**Supplementary Table 6** - Correlations between metabolic parameters recorded at the second blood draw (12 PM) and DNA methylation recorded at the last draw (6 PM) in subject-averaged repeated measurements (n=5 per subject).

| Variable        | Day | Pearson's r |
|-----------------|-----|-------------|
| TG (mg/dL)      | FD  | 0.080       |
|                 | PD  | -0.057      |
| WBFA (mmol /L)  | FD  | 0.021       |
|                 | PD  | -0.181      |
| HDL (mg/dL)     | FD  | -0.394      |
|                 | PD  | -0.474      |
| LDL (mg/dL)     | FD  | 0.152       |
|                 | PD  | -0.307      |
| VLDL (mg/dL)    | FD  | -0.333      |
|                 | PD  | -0.570      |
| TC (mg/dL)      | FD  | -0.196      |
|                 | PD  | -0.571      |
| Glucose (mg/dL) | FD  | -0.722*     |
|                 | PD  | -0.308      |

**Supplementary Table 7 – Significant associations of age with FAs (dependent variable) in the AMM subjects.**

| Sample | Variable | Beta   | t      | p      | adjusted R <sup>2</sup> |
|--------|----------|--------|--------|--------|-------------------------|
| PD     | C17:0    | 0.0432 | 2.3792 | 0.0365 | 0.2231                  |
|        | C20:4    | 0.2690 | 3.1271 | 0.0096 | 0.3842                  |
|        | C20:2    | 0.0311 | 2.5245 | 0.0282 | 0.3042                  |
|        | C20:5    | 0.0330 | 2.5213 | 0.0284 | 0.3153                  |
|        | C22:4    | 0.1070 | 2.6456 | 0.0228 | 0.2872                  |
|        | C22:5    | 0.0713 | 2.6889 | 0.0211 | 0.3105                  |
|        | C22:6    | 0.1382 | 2.9062 | 0.0143 | 0.3387                  |
| FD     | C17:0    | 0.0344 | 2.5849 | 0.0254 | 0.2674                  |
|        | C18:0    | 0.1001 | 2.3687 | 0.0372 | 0.9334                  |
|        | C18:2    | 0.4027 | 2.8105 | 0.0169 | 0.6277                  |
|        | C18:3    | 0.0259 | 3.0880 | 0.0115 | 0.3921                  |
|        | C20:2    | 0.0239 | 2.6342 | 0.0232 | 0.2923                  |
|        | C20:3    | 0.0567 | 2.8687 | 0.0153 | 0.6156                  |
|        | C20:4    | 0.2529 | 3.3389 | 0.0066 | 0.5474                  |
|        | C20:5    | 0.0314 | 2.9714 | 0.0127 | 0.3459                  |
|        | C22:5    | 0.0673 | 2.8145 | 0.0168 | 0.3244                  |
|        | C22:4    | 0.1043 | 3.1421 | 0.0094 | 0.3787                  |
|        | C22:6    | 0.1359 | 3.3920 | 0.0060 | 0.4230                  |

Beta values indicate the change percent FA per one-year age increase. Non-significant associations are listed in Table 2.6.

**Supplementary Table 8 – Significant associations of FAs with weight (dependent variable) in the LI cohort.**

|                                           | Variable   | Beta    | t       | p      | adjusted R <sup>2</sup> |
|-------------------------------------------|------------|---------|---------|--------|-------------------------|
| Weight at birth                           | C18:2(n-6) | -0.0725 | -2.2201 | 0.0360 | 0.1439                  |
| Birth-to-sampling weight increase per day | C16:0      | -0.0104 | -2.2515 | 0.0409 | 0.1689                  |
|                                           | C17:1      | -0.1315 | -2.4783 | 0.0265 |                         |

Beta values indicate the change in weight (kg or kg/day) per one-point increase in percent FA. Non-significant associations are shown in Supplementary Table 2.2.

**Supplementary Table 9 – Significant associations of FAs with BMI (dependent variable) in the AMM subjects.**

| Sample | Variable | Beta    | t       | p      | adjusted R <sup>2</sup> |
|--------|----------|---------|---------|--------|-------------------------|
| PD     | C16:0    | 0.6555  | 6.0836  | 0.0089 | 0.9929                  |
|        | C16:1    | 4.2835  | 4.7498  | 0.0177 |                         |
|        | C22:5    | -77.797 | -2.5582 | 0.0285 |                         |
| FD     | C18:0    | 2.3419  | 4.4180  | 0.0215 | 0.9704                  |

Beta values indicate the change in BMI per one-point increase in percent FA. Non-significant associations are shown in Supplementary Table 2.7.
